# Supplementary material for: Transcriptomic Analyses of Grapevine Leafroll-Associated Virus 3 Infection in Leaves and Berries of ‘Cabernet Franc’
Source: MDPI journal article supplement (doi:10.3390/v14081831), 2022-08-21
Supplement: s1 [file s1]

**Table S6** Key biological process and its associated genes differentially regulated in GLRaV-3-infected leaf and berry at E-L 31, 35, and 38 developmental stages.

*\*Degree of expressional change (fold change) and significant difference (FDR values) were calculated by differential expression analysis with DESeq2. For full list of differentially expressed genes (DEGs) and their associated fold change and FDR values at each developmental stages of leaf and berry, please refer to STable 4.*

*\*The genes included are DEGs that past FDR <0.05 threshold.*

*\*Gene ID and gene description were retrieved from Ensembl plants.*

*\*N/A indicates that no DEG was detected at FDR <0.05 threshold.*

| A. Down-regulation |        |                     |                   |                                                                 |              |             |
|--------------------|--------|---------------------|-------------------|-----------------------------------------------------------------|--------------|-------------|
| Cellular process   | Tissue | Developmental stage | Gene ID           | Gene description                                                | Fold change  | FDR value   |
| Photosynthesis     | Leaf   | E-L 31              | VIT_08s0040g00850 | PSBP domain-containing protein 6, chloroplastic                 | -1.99199599  | 0.033903241 |
|                    |        |                     | VIT_14s0128g00030 | PSBP domain-containing protein                                  | -1.650587644 | 0.017176662 |
|                    |        |                     | VIT_00s0181g00180 | Chlorophyll a-b binding protein 13, chloroplastic               | -1.431019538 | 0.003692198 |
|                    |        |                     | VIT_13s0019g00260 | Putative oxygen evolving enhancer protein                       | -1.308234815 | 0.006368829 |
|                    |        |                     | VIT_13s0019g00320 | Photosynthetic NDH subunit of lumenal location 1, chloroplastic | -1.2937063   | 0.020103386 |
|                    |        |                     | VIT_19s0014g05080 | Uncharacterized protein                                         | -1.292630128 | 0.000480496 |
|                    |        |                     | VIT_14s0081g00060 | PSII 6.1 kDa protein                                            | -1.211161416 | 0.002141469 |
|                    |        |                     | VIT_10s0003g02900 | Chlorophyll a-b binding protein of LHCII type 1                 | -1.185162996 | 0.001994627 |

|                                   |           |        |                                                                                                                                                                                           |                                                                      |                  |                 |
|-----------------------------------|-----------|--------|-------------------------------------------------------------------------------------------------------------------------------------------------------------------------------------------|----------------------------------------------------------------------|------------------|-----------------|
|                                   |           |        | VIT_00s09<br>04g00010                                                                                                                                                                     | Oxygen-<br>evolving<br>enhancer<br>protein 3,<br>chloroplastic       | -<br>1.168540939 | 0.0028<br>47964 |
|                                   |           |        | VIT_10s01<br>16g00900                                                                                                                                                                     | Chaperonin-<br>like RBCX<br>protein 1,<br>chloroplastic              | -<br>1.063521336 | 0.0294<br>91686 |
|                                   |           |        | VIT_19s00<br>15g01760                                                                                                                                                                     | PSI-G                                                                | -<br>0.829651289 | 0.0432<br>3668  |
|                                   |           |        | VIT_10s00<br>03g04350                                                                                                                                                                     | PSI reaction<br>center subunit<br>psaK,<br>chloroplastic             | -<br>0.828464574 | 0.0206<br>85447 |
|                                   |           |        | VIT_11s00<br>16g01400                                                                                                                                                                     | Uncharacteriz<br>ed protein                                          | -<br>0.780210214 | 0.0204<br>63039 |
|                                   |           |        | VIT_12s00<br>28g00320                                                                                                                                                                     | Chlorophyll a-<br>b binding<br>protein 40,<br>chloroplastic-<br>like | -<br>0.773527941 | 0.0235<br>54993 |
|                                   | Lea<br>f  | E-L 35 | *A total of 49 down-regulated DEGs were involved in<br>photosynthesis, for detailed list of down-DEGs<br>involved in photosynthesis, please refer to S Table 5,<br>'E-L 35 Leaf' subsheet |                                                                      |                  |                 |
|                                   | Ber<br>ry | E-L 31 | N/A                                                                                                                                                                                       | N/A                                                                  | N/A              | N/A             |
|                                   | Ber<br>ry | E-L 35 | N/A                                                                                                                                                                                       | N/A                                                                  | N/A              | N/A             |
|                                   | Ber<br>ry | E-L 38 | N/A                                                                                                                                                                                       | N/A                                                                  | N/A              | N/A             |
|                                   |           |        |                                                                                                                                                                                           |                                                                      |                  |                 |
| Chloroplast<br>rRNA<br>processing | Lea<br>f  | E-L 31 | VIT_13s00<br>64g01430                                                                                                                                                                     | 30S ribosomal<br>protein 2,<br>chloroplastic                         | -<br>1.274681552 | 0.0161<br>61032 |
|                                   |           |        | VIT_17s00<br>00g09680                                                                                                                                                                     | 28 kDa<br>ribonucleoprot<br>ein,<br>chloroplastic                    | -<br>1.161692835 | 0.0059<br>82332 |
|                                   |           |        | VIT_14s00<br>66g00140                                                                                                                                                                     | 28 kDa<br>ribonucleoprot                                             | -<br>0.874158366 | 0.0172<br>12347 |
|                                   |           |        |                                                                                                                                                                                           |                                                                      |                  |                 |

|                                        |       |        |                       |                                                                    |                                       |                  |
|----------------------------------------|-------|--------|-----------------------|--------------------------------------------------------------------|---------------------------------------|------------------|
|                                        |       |        |                       | ein,<br>chloroplastic                                              |                                       |                  |
|                                        |       |        |                       | 29 kDa                                                             |                                       |                  |
|                                        |       |        |                       | VIT_08s00<br>40g01760                                              | ribonucleoprotein A,<br>chloroplastic | -<br>0.866751862 |
|                                        |       |        |                       |                                                                    |                                       | 0.0116<br>1672   |
|                                        | Leaf  | E-L 35 | N/A                   | N/A                                                                | N/A                                   | N/A              |
|                                        | Berry | E-L 31 | N/A                   | N/A                                                                | N/A                                   | N/A              |
|                                        | Berry | E-L 35 | N/A                   | N/A                                                                | N/A                                   | N/A              |
| Plastid<br>transcription               | Berry | E-L 38 | N/A                   | N/A                                                                | N/A                                   | N/A              |
|                                        | Leaf  | E-L 31 | VIT_01s00<br>11g01080 | Protein<br>PLASTID<br>TRANSCRIPTIONALLY<br>ACTIVE 14               | -<br>1.312743353                      | 0.0444<br>36754  |
|                                        |       |        |                       | Fructokinase-like 2,<br>chloroplastic                              | -<br>1.116663713                      | 0.0292<br>80554  |
|                                        |       |        |                       | Transcription<br>termination<br>factor<br>MTERF4,<br>chloroplastic | -<br>0.918594687                      | 0.0225<br>33095  |
|                                        |       |        |                       |                                                                    |                                       |                  |
|                                        |       |        |                       |                                                                    |                                       |                  |
|                                        | Leaf  | E-L 35 | N/A                   | N/A                                                                | N/A                                   | N/A              |
|                                        | Berry | E-L 31 | N/A                   | N/A                                                                | N/A                                   | N/A              |
|                                        | Berry | E-L 35 | N/A                   | N/A                                                                | N/A                                   | N/A              |
|                                        | Berry | E-L 38 | N/A                   | N/A                                                                | N/A                                   | N/A              |
| Chlorophyll<br>biosynthetic<br>process | Leaf  | E-L 31 | N/A                   | N/A                                                                | N/A                                   | N/A              |
|                                        | Leaf  | E-L 35 | VIT_08s00<br>07g08540 | CHLH<br>magnesium                                                  | -<br>2.698812022                      | 0.0006<br>1374   |

|                         |       |        |                   |                                                                                      |                  |                 |
|-------------------------|-------|--------|-------------------|--------------------------------------------------------------------------------------|------------------|-----------------|
|                         |       |        |                   | chelatase H subunit                                                                  |                  |                 |
|                         |       |        |                   | Protochlorophyllide reductase, chloroplastic                                         | -<br>2.655802771 | 1.3520<br>2E-06 |
|                         |       |        |                   | Uncharacterized protein                                                              | -<br>2.111207648 | 0.0014<br>93512 |
|                         |       |        |                   | Magnesium-protoporphyrin IX monomethyl ester [oxidative] cyclase, chloroplastic-like | -<br>2.064978918 | 0.0068<br>33531 |
|                         |       |        |                   | Protochlorophyllide reductase                                                        | -<br>1.918082208 | 0.0045<br>01822 |
|                         |       |        |                   | Probable 1-deoxy-D-xylulose-5-phosphate synthase, chloroplastic                      | -<br>1.627046679 | 0.0060<br>92146 |
|                         |       |        |                   | Uroporphyrinogen decarboxylase                                                       | -<br>1.341399694 | 0.0379<br>02476 |
|                         | Berry | E-L 31 | N/A               | N/A                                                                                  | N/A              | N/A             |
|                         | Berry | E-L 35 | N/A               | N/A                                                                                  | N/A              | N/A             |
|                         | Berry | E-L 38 | N/A               | N/A                                                                                  | N/A              | N/A             |
|                         |       |        |                   |                                                                                      |                  |                 |
| Carbohydrate metabolism | Leaf  | E-L 31 | VIT_11s0016g00470 | Sucrose synthase (VvSUS)                                                             | -<br>1.548123753 | 0.0064<br>30004 |
|                         |       |        | VIT_05s0077g00510 | Neutral invertase (VvNIV)                                                            | -<br>1.308977202 | 0.0080<br>78829 |
|                         |       |        |                   |                                                                                      |                  |                 |

|                         |          |                       |                                      |                       |                                                       |                  |                 |
|-------------------------|----------|-----------------------|--------------------------------------|-----------------------|-------------------------------------------------------|------------------|-----------------|
| Lea<br>f                | E-L 35   | VIT_12s00<br>59g02670 | Beta-amylase<br>(VvBMY)              | -<br>2.308800198      | 0.0421<br>86627                                       |                  |                 |
|                         |          | VIT_05s00<br>20g01910 | Beta-amylase<br>(VvBMY)              | -<br>1.961451369      | 0.0003<br>20976                                       |                  |                 |
|                         |          | VIT_08s00<br>07g01570 | Fructose<br>bisphosphates<br>(VvFBP) | -<br>1.839839925      | 0.0116<br>99588                                       |                  |                 |
|                         |          | VIT_05s00<br>77g00510 | Neutral<br>invertase<br>(VvNIV)      | -<br>1.764111238      | 0.0052<br>89888                                       |                  |                 |
|                         |          | VIT_02s01<br>09g00080 | Phosphoribulo<br>kinase<br>(VvPRK)   | -<br>1.759907347      | 0.0127<br>33449                                       |                  |                 |
|                         |          | VIT_03s00<br>38g00380 | D-ribulose<br>kinase<br>(VvPSK)      | -1.71631345           | 0.0408<br>54439                                       |                  |                 |
|                         |          | VIT_02s01<br>54g00100 | Transaldolase<br>(VvTALDO)           | -<br>1.625053341      | 0.0113<br>84389                                       |                  |                 |
|                         |          | VIT_01s00<br>11g05210 | Phosphogluco<br>mutase<br>(VvPGM)    | -<br>1.453673213      | 0.0109<br>79642                                       |                  |                 |
|                         |          | VIT_17s00<br>00g02260 | Aldose 1-<br>epimerase               | -<br>1.287142274      | 0.0499<br>04321                                       |                  |                 |
|                         |          | Ber<br>ry             | E-L 31                               | VIT_00s28<br>40g00010 | Phosphoenolp<br>yruvate<br>carboxykinase<br>(VvPEPCK) | -<br>0.526783839 | 0.0437<br>10289 |
|                         |          |                       |                                      | VIT_00s25<br>76g00010 | Phosphoenolp<br>yruvate<br>carboxykinase<br>(VvPEPCK) | -0.44549967      | 0.0428<br>61108 |
|                         |          |                       |                                      | VIT_00s19<br>95g00010 | Phosphoenolp<br>yruvate<br>carboxykinase<br>(VvPEPCK) | -<br>0.426019813 | 0.0128<br>55684 |
| Ber<br>ry               | E-L 35   |                       |                                      | N/A                   | N/A                                                   | N/A              | N/A             |
| Ber<br>ry               | E-L 38   | N/A                   | N/A                                  | N/A                   | N/A                                                   |                  |                 |
| Cell wall<br>metabolism | Lea<br>f | E-L 31                | VIT_01s00<br>26g02620                | Expansin              | -<br>4.110101857                                      | 0.0119<br>63935  |                 |

|                 |       |        |                       |                                                     |             |             |
|-----------------|-------|--------|-----------------------|-----------------------------------------------------|-------------|-------------|
|                 |       |        | VIT_14s01<br>08g01020 | Expansin                                            | -3.80167402 | 3.20E-06    |
|                 |       |        | VIT_13s00<br>67g02930 | Expansin                                            | -           | 0.046829039 |
|                 |       |        | VIT_02s00<br>25g01330 | Polygalacturonase                                   | -           | 0.00578332  |
|                 |       |        | VIT_13s00<br>64g01720 | Beta-galactosidase                                  | -           | 0.000436275 |
|                 |       |        | VIT_13s00<br>67g02930 | Expansin                                            | -           | 1.0373E-06  |
|                 |       |        | VIT_06s00<br>04g07970 | Expansin                                            | -           | 0.032065526 |
|                 |       |        | VIT_07s00<br>31g02480 | Beta-galactosidase                                  | -           | 0.000630032 |
|                 |       |        | VIT_02s00<br>25g01330 | Polygalacturonase                                   | -           | 0.01842931  |
|                 |       |        | VIT_09s00<br>02g02120 | Beta-galactosidase                                  | -           | 0.014438646 |
|                 | Leaf  | E-L 35 |                       |                                                     |             |             |
|                 | Berry | E-L 31 | N/A                   | N/A                                                 | N/A         | N/A         |
|                 | Berry | E-L 35 | N/A                   | N/A                                                 | N/A         | N/A         |
|                 | Berry | E-L 38 | N/A                   | N/A                                                 | N/A         | N/A         |
|                 |       |        |                       |                                                     |             |             |
|                 |       |        |                       |                                                     |             |             |
|                 | Leaf  | E-L 31 | N/A                   | N/A                                                 | N/A         | N/A         |
|                 |       |        | VIT_18s00<br>76g00220 | Sucrose transporter 2 (VvSUT2)                      | -           | 0.026456582 |
|                 |       |        | VIT_04s00<br>23g01500 | Putative polyol/monosaccharide transporter (VvPMT3) | -           | 0.000909145 |
|                 |       |        | VIT_18s00<br>76g00250 | Sucrose transporter 27 (VvSUT27)                    | -           | 9.13414E-06 |
|                 |       |        | VIT_11s01<br>49g00050 | Hexose transporter 3/7 (VvHT3/7)                    | -           | 0.005609524 |
| Sugar transport | Leaf  | E-L 35 |                       |                                                     |             |             |
|                 | Berry | E-L 31 | N/A                   | N/A                                                 | N/A         | N/A         |

|                          |       |        |                   |                                               |              |             |
|--------------------------|-------|--------|-------------------|-----------------------------------------------|--------------|-------------|
|                          | Berry | E-L 35 | N/A               | N/A                                           | N/A          | N/A         |
|                          | Berry | E-L 38 | N/A               | N/A                                           | N/A          | N/A         |
|                          |       |        |                   |                                               |              |             |
|                          | Leaf  | E-L 31 | N/A               | N/A                                           | N/A          | N/A         |
| Mitochondrion-associated | Leaf  | E-L 35 | VIT_16s0039g02750 | Glutamate dehydrogenase (VvGDH)               | -2.553537017 | 0.040452982 |
|                          |       |        | VIT_00s1286g00020 | Translation elongation factor                 | -2.197594459 | 0.001509423 |
|                          |       |        | VIT_09s0002g04330 | Mitochondrial ribosomal protein               | -1.965057526 | 0.003534502 |
|                          |       |        | VIT_19s0015g00140 | Mitochondrial ribosomal protein               | -1.917158837 | 0.005272773 |
|                          |       |        | VIT_18s0001g03850 | Mitochondrial ribosomal protein               | -1.706629018 | 0.006407113 |
|                          |       |        | VIT_00s0323g00080 | Translation elongation factor                 | -1.681144532 | 0.008073655 |
|                          |       |        | VIT_05s0049g00470 | Electron transfer flavoprotein subunit beta   | -1.40078102  | 0.037958832 |
|                          |       |        | VIT_19s0014g04970 | Mitochondrial ribosomal protein               | -1.33398672  | 0.049830236 |
|                          | Berry | E-L 31 | N/A               | N/A                                           | N/A          | N/A         |
|                          | Berry | E-L 35 | VIT_06s0009g03590 | Reactive oxygen species modulator 1 (VvROMO1) | -1.034816368 | 0.038007393 |
|                          |       |        | VIT_05s0020g02150 | NADH dehydrogenase [ubiquinone] 1 alpha       | -0.97007366  | 0.015243494 |

|           |        |                       |                                                                                           |                  |                 |
|-----------|--------|-----------------------|-------------------------------------------------------------------------------------------|------------------|-----------------|
|           |        |                       | subcomplex<br>subunit 8-B                                                                 |                  |                 |
|           |        | VIT_01s01<br>37g00340 | Uncharacteriz<br>ed protein                                                               | -<br>0.959519843 | 0.0327<br>10584 |
|           |        | VIT_02s00<br>25g02990 | Mitochondrial<br>import inner<br>membrane<br>translocase<br>subunit<br>TIM13<br>(VvTIM13) | -<br>0.955229294 | 0.0330<br>15689 |
|           |        | VIT_11s01<br>03g00270 | NADH<br>dehydrogenase<br>[ubiquinone] 1<br>alpha<br>subcomplex<br>subunit 1               | -<br>0.916141105 | 0.0334<br>55189 |
|           |        | VIT_06s00<br>80g00540 | Uncharacteriz<br>ed protein                                                               | -<br>0.783549942 | 0.0398<br>873   |
| Ber<br>ry | E-L 38 | N/A                   | N/A                                                                                       | N/A              | N/A             |



|                                               |        |        |                   |                                                   |              |             |
|-----------------------------------------------|--------|--------|-------------------|---------------------------------------------------|--------------|-------------|
|                                               | Ber ry | E-L 38 | N/A               | N/A                                               | N/A          | N/A         |
| Defense mechanism                             | Lea f  | E-L 31 | N/A               | N/A                                               | N/A          | N/A         |
|                                               | Lea f  | E-L 35 | VIT_05s0077g01670 | Pathogenesis-related protein 10.7 (VvPR-10.7)     | -9.930153917 | 6.44732E-05 |
|                                               | Ber ry | E-L 31 | N/A               | N/A                                               | N/A          | N/A         |
|                                               | Ber ry | E-L 35 | N/A               | N/A                                               | N/A          | N/A         |
|                                               | Ber ry | E-L 38 | VIT_05s0077g01670 | Pathogenesis-related protein 10.7 (VvPR-10.7)     | -1.134068074 | 0.000626765 |
| Heat shock protein (HSP) and HSP co-chaperons | Lea f  | E-L 31 | N/A               | N/A                                               | N/A          | N/A         |
|                                               | Lea f  | E-L 35 | VIT_15s0046g01560 | BAG family molecular chaperone regulator 6 (BAG6) | -2.962246735 | 2.19805E-07 |
|                                               |        |        | VIT_18s0001g01570 | 16.9kDa HSP class I                               | -2.703856226 | 0.00012535  |
|                                               |        |        | VIT_02s0025g00280 | HSP83                                             | -1.967049793 | 0.016661365 |
|                                               |        |        | VIT_15s0021g00830 | Chaperonin GroES                                  | -1.704049014 | 0.006114618 |
|                                               |        |        | VIT_09s0002g03930 | HSP60                                             | -1.670062319 | 0.036612176 |
|                                               |        |        | Ber ry            | E-L 31                                            | N/A          | N/A         |
|                                               | Ber ry | E-L 35 | N/A               | N/A                                               | N/A          | N/A         |
|                                               | Ber ry | E-L 38 | N/A               | N/A                                               | N/A          | N/A         |

|                       |       |        |                   |                           |              |             |
|-----------------------|-------|--------|-------------------|---------------------------|--------------|-------------|
| Transcription factors | Leaf  | E-L 31 | N/A               | N/A                       | N/A          | N/A         |
|                       |       |        | VIT_00s0226g00070 | Protein SHORT ROOT/SHR    | -10.74683952 | 1.69584E-07 |
|                       |       | E-L 35 | VIT_14s0108g00420 | Transcription factor PRE2 | -8.138166707 | 0.029248163 |
|                       |       |        | VIT_04s0008g05560 | IAA28                     | -7.66134994  | 6.61887E-06 |
|                       |       |        | VIT_08s0056g00050 | Protein SCARECROW/SCR     | -6.384202169 | 0.023163259 |
|                       |       |        | VIT_05s0020g04690 | IAA14                     | -2.519923737 | 3.06575E-05 |
|                       |       |        | VIT_15s0046g00290 | ARF18                     | -1.982160394 | 0.002477448 |
|                       |       |        | VIT_11s0016g03540 | IAA27                     | -1.51840453  | 0.012627664 |
|                       |       |        | VIT_02s0025g01740 | ARF9                      | -1.333772382 | 0.037833687 |
|                       |       |        | VIT_18s0001g08090 | IAA                       | -1.296871905 | 0.024004196 |
|                       | Berry | E-L 31 | N/A               | N/A                       | N/A          | N/A         |
|                       |       |        | VIT_11s0016g00660 | ERF017                    | -5.759829656 | 0.001535734 |
|                       |       | E-L 35 | VIT_03s0063g00460 | ERF109                    | -3.959097156 | 0.005743998 |
|                       |       |        | VIT_16s0013g00950 | ERF105                    | -3.939262956 | 0.024882223 |
|                       |       |        | VIT_16s0013g01110 | ERF005                    | -3.268995095 | 0.020280177 |
|                       |       |        | VIT_16s0013g00990 | ERF005                    | -2.643451912 | 0.044893097 |
|                       |       |        | VIT_07s0141g00690 | ERF011                    | -2.337779483 | 0.009044125 |
|                       |       |        | VIT_01s0011g03070 | ERF RAV1                  | -2.326366551 | 0.0453749   |
|                       |       |        | VIT_12s0028g03270 | ERF004                    | -2.144067757 | 0.011025863 |
|                       |       |        | VIT_19s0014g02240 | ERF004                    | -1.853191933 | 0.013494055 |
|                       |       |        | VIT_18s0089g01030 | ERF TINY                  | -1.755868123 | 0.003373735 |

|           |        |  |                       |        |                  |                 |
|-----------|--------|--|-----------------------|--------|------------------|-----------------|
|           |        |  | VIT_10s00<br>03g00140 | ERF004 | -<br>1.589187054 | 0.0121<br>39086 |
|           |        |  | VIT_07s00<br>31g00190 | ERF008 | -<br>1.363387699 | 0.0114<br>03663 |
|           |        |  | VIT_02s02<br>34g00130 | ERF002 | -<br>1.284901335 | 0.0265<br>60263 |
| Ber<br>ry | E-L 38 |  | N/A                   | N/A    | N/A              | N/A             |

| B. Up-regulation    |            |                         |                       |                                                      |                 |                 |
|---------------------|------------|-------------------------|-----------------------|------------------------------------------------------|-----------------|-----------------|
| Cellular<br>process | Tis<br>sue | Developme<br>ntal stage | Gene ID               | Gene<br>description                                  | Fold<br>change  | FDR<br>value    |
|                     | Lea<br>f   | E-L 31                  | N/A                   | N/A                                                  | N/A             | N/A             |
|                     | Lea<br>f   | E-L 35                  | N/A                   | N/A                                                  | N/A             | N/A             |
| Photosynthesi<br>s  | Ber<br>ry  | E-L 31                  | VIT_00s01<br>81g00180 | Chlorophyll a-b<br>binding protein,<br>chloroplastic | 0.9787612<br>74 | 2.5840<br>7E-05 |
|                     |            |                         | VIT_08s00<br>07g08540 | Magnesium<br>chelataase                              | 0.9487021<br>86 | 0.0011<br>18541 |
|                     |            |                         | VIT_12s00<br>28g00320 | Chlorophyll a-b<br>binding protein,<br>chloroplastic | 0.8438033<br>66 | 0.0293<br>37049 |
|                     |            |                         | VIT_19s00<br>14g00160 | Chlorophyll a-b<br>binding protein,<br>chloroplastic | 0.8308056<br>31 | 0.0244<br>82006 |
|                     |            |                         | VIT_18s00<br>01g10550 | Chlorophyll a-b<br>binding protein,<br>chloroplastic | 0.6847704<br>52 | 0.0224<br>18583 |
|                     |            |                         | VIT_04s00<br>44g01410 | Uncharacterized<br>protein                           | 0.6823044<br>47 | 0.0006<br>98058 |
|                     |            |                         | VIT_07s00<br>05g02220 | Chlorophyll a-b<br>binding protein,<br>chloroplastic | 0.6252855<br>18 | 0.0001<br>00081 |

|           |        |                       |                                                                                       |                    |                 |
|-----------|--------|-----------------------|---------------------------------------------------------------------------------------|--------------------|-----------------|
|           |        | VIT_12s00<br>55g01110 | Chlorophyll a-b<br>binding protein,<br>chloroplastic                                  | 0.6148984<br>66202 | 0.0089          |
|           |        | VIT_04s00<br>08g01730 | Uncharacterized<br>protein                                                            | 0.5737578<br>64    | 0.0418<br>4377  |
|           |        | VIT_10s00<br>03g04350 | PSI-K<br>(Photosystem I<br>subunit X)                                                 | 0.5683601<br>69    | 0.0454<br>72904 |
|           |        | VIT_17s00<br>00g03690 | Ribulose<br>biphosphate<br>carboxylase<br>small subunit<br>(RuBisCO small<br>subunit) | 0.5611542<br>96    | 0.0011<br>45619 |
|           |        | VIT_08s00<br>40g00390 | Magnesium-<br>protoporphyrin<br>IX monomethyl<br>ester (oxidative)<br>cyclase         | 0.5597130<br>19    | 0.0029<br>28141 |
|           |        | VIT_07s00<br>05g04400 | Photosystem II<br>reaction center<br>Psb28 protein                                    | 0.5362450<br>52    | 0.0218<br>64576 |
|           |        | VIT_10s00<br>03g02900 | Chlorophyll a-b<br>binding protein,<br>chloroplastic                                  | 0.5252348<br>4     | 0.0007<br>40937 |
|           |        | VIT_19s00<br>14g03850 | Plastoquinol--<br>plastocyanin<br>reductase                                           | 0.5003339<br>08    | 0.0125<br>90557 |
|           |        | VIT_00s02<br>07g00210 | Uncharacterized<br>protein                                                            | 0.4879670<br>68    | 0.0086<br>53088 |
|           |        | VIT_12s00<br>57g00020 | Uncharacterized<br>protein                                                            | 0.4596435<br>08    | 0.0027<br>55571 |
|           |        | VIT_00s09<br>04g00010 | Uncharacterized<br>protein                                                            | 0.4537288<br>05    | 0.0045<br>95422 |
|           |        | VIT_15s00<br>24g00040 | Chlorophyll a-b<br>binding protein,<br>chloroplastic                                  | 0.4489625<br>62    | 0.0432<br>78122 |
|           |        | VIT_04s00<br>23g00410 | PSI subunit V                                                                         | 0.4450055<br>61    | 0.0267<br>89559 |
| Ber<br>ry | E-L 35 | N/A                   | N/A                                                                                   | N/A                | N/A             |
| Ber<br>ry | E-L 38 | N/A                   | N/A                                                                                   | N/A                | N/A             |

|                         |       |        |                   |                                                                       |             |             |
|-------------------------|-------|--------|-------------------|-----------------------------------------------------------------------|-------------|-------------|
|                         | Leaf  | E-L 31 | N/A               | N/A                                                                   | N/A         | N/A         |
| Carbohydrate metabolism | Leaf  | E-L 35 | VIT_02s0025g02790 | Granule-bound starch synthase 1, chloroplastic/amyloplastic (VvGBSS1) | 2.432168517 | 0.029050767 |
|                         |       |        | VIT_18s0001g00560 | Alpha-amylase (VvAMY)                                                 | 2.107962246 | 0.03403715  |
|                         |       |        | VIT_03s0063g00400 | Alpha-amylase (VvAMY)                                                 | 1.865813776 | 0.002551314 |
|                         |       |        | VIT_03s0038g00670 | Aldolase and fructose biphosphatase (VvFBP)                           | 1.127195337 | 0.000300258 |
|                         |       |        | VIT_08s0007g01570 | Aldolase and fructose biphosphatase (VvFBP)                           | 1.041426285 | 8.76918E-06 |
|                         | Berry | E-L 31 | VIT_04s0023g03010 | Aldolase and fructose biphosphatase (VvFBP)                           | 0.730823016 | 0.006163961 |
|                         |       |        | VIT_13s0019g03350 | Aldolase and fructose biphosphatase (VvFBP)                           | 0.67705116  | 0.003234988 |
|                         |       |        | VIT_17s0000g03690 | RuBisCO small subunit                                                 | 0.561154296 | 0.001145619 |
|                         |       |        | VIT_12s0028g02180 | PEP carboxylase (VvPEPCase)                                           | 0.409252683 | 0.007891183 |
|                         |       |        | VIT_01s0011g02740 | PEP carboxylase (VvPEPCase)                                           | 0.387905072 | 0.021337078 |
|                         |       | Berry  | VIT_05s0077g01930 | Sucrose synthase (VvSUS)                                              | 3.569665361 | 0.015715931 |
|                         |       |        | VIT_11s0016g00470 | Sucrose synthase (VvSUS)                                              | 0.980264567 | 6.03957E-06 |
| Cell wall metabolism    | Leaf  | E-L 31 | VIT_01s0026g00200 | Xyloglucan endotransglucosylase/hydrolase                             | 5.681804968 | 0.002130956 |

|       |        |           |                   |           |        |
|-------|--------|-----------|-------------------|-----------|--------|
| Leaf  | E-L 35 | VIT_02s00 | Cellulose         | 4.8033665 | 0.0043 |
|       |        | 25g01890  | synthase          | 19        | 53587  |
|       |        | VIT_02s00 | Cellulose         | 3.9855728 | 0.0493 |
|       |        | 25g01920  | synthase          | 3         | 77963  |
|       |        | VIT_02s00 | Cellulose         | 1.5505311 | 0.0071 |
|       |        | 25g01750  | synthase          | 21        | 77193  |
|       |        | VIT_05s00 | Cellulose         | 1.2528258 | 0.0135 |
|       |        | 49g00010  | synthase          | 21        | 75809  |
|       |        | VIT_19s00 | Cellulose         | 1.2184423 | 2.78E- |
|       |        | 15g00730  | synthase          | 3         | 05     |
|       |        | VIT_05s00 | Cellulose         | 1.1559656 | 0.0132 |
|       |        | 20g05050  | synthase          | 74        | 62747  |
|       |        | VIT_05s00 | Chitinase-related | 10.658460 | 3.5421 |
|       |        | 94g00330  | protein           | 19        | 1E-05  |
|       |        |           | Xyloglucan        |           |        |
|       |        | VIT_01s00 | endotransglucosy  | 5.3745213 | 2.4667 |
|       |        | 26g00200  | lase/hydrolase    | 31        | 3E-05  |
|       |        |           | Xyloglucan        |           |        |
|       |        | VIT_12s01 | endotransglucosy  | 5.3217795 | 0.0037 |
|       |        | 34g00160  | lase/hydrolase    | 47        | 67351  |
|       |        |           | Xyloglucan        |           |        |
|       |        | VIT_11s00 | endotransglucosy  | 4.7124083 | 1.2678 |
|       |        | 52g01200  | lase/hydrolase    | 19        | 5E-05  |
|       |        | VIT_15s00 |                   | 2.4615388 | 0.0056 |
|       |        | 46g01570  | Endochitinase     | 49        | 5505   |
|       |        | VIT_04s00 | Chitinase-related | 2.3100049 | 0.0002 |
|       |        | 08g00140  | protein           | 82        | 00818  |
| Berry | E-L 31 | VIT_15s00 | Pectinesterase    | 2.3168209 | 0.0495 |
|       |        | 48g00510  | (VvPE)            | 98        | 79898  |
|       |        |           | Cytochrome        |           |        |
|       |        | VIT_06s00 | P450 86A1         | 1.4451834 | 0.0275 |
|       |        | 04g06210  | (VvCYP86A1)       | 46        | 94962  |
|       |        | VIT_09s00 |                   | 1.1946447 | 0.0134 |
|       |        | 02g08510  | Expansion         | 22        | 55533  |
|       |        |           | Xyloglucan        |           |        |
|       |        | VIT_05s00 | endotransglucosy  | 0.9222265 | 0.0008 |
|       |        | 62g00240  | lase/hydrolase    | 33        | 34196  |
|       |        |           | Xyloglucan        |           |        |
|       |        | VIT_08s00 | endotransglucosy  | 0.9212874 | 0.0183 |
|       |        | 07g04950  | lase/hydrolase    | 29        | 37571  |
|       |        |           | Xyloglucan        |           |        |
|       |        | VIT_11s00 | endotransglucosy  | 0.8586837 | 0.0098 |
|       |        | 52g01250  | lase/hydrolase    | 69        | 14869  |
|       |        | VIT_11s00 | Pectinesterase    | 0.7610273 | 0.0006 |
|       |        | 16g00330  | (VvPE)            | 32        | 98058  |

|                    |           |        |                       |                                                              |                 |                 |
|--------------------|-----------|--------|-----------------------|--------------------------------------------------------------|-----------------|-----------------|
|                    |           |        | VIT_19s00<br>14g00450 | Protein trichome<br>birefringence                            | 0.7385530<br>35 | 0.0059<br>76317 |
|                    |           |        | VIT_14s00<br>83g01100 | UDP-<br>arabinopyranose<br>mutase 3                          | 0.7036000<br>45 | 0.0021<br>34208 |
|                    |           |        | VIT_14s01<br>08g01020 | Expansion                                                    | 0.6676046<br>26 | 0.0002<br>78588 |
|                    |           |        | VIT_08s00<br>07g03990 | Glucomannan 4-<br>beta-<br>mannosyltransfer<br>ase           | 0.6248591<br>59 | 0.0148<br>92072 |
|                    |           |        | VIT_05s00<br>29g00480 | Eceriferum 26                                                | 0.4728219<br>32 | 0.0076<br>34942 |
|                    |           |        | VIT_17s00<br>00g05070 | COBRA                                                        | 0.4423897<br>2  | 0.0150<br>22359 |
|                    | Ber<br>ry | E-L 35 | N/A                   | N/A                                                          | N/A             | N/A             |
|                    | Ber<br>ry | E-L 38 | N/A                   | N/A                                                          | N/A             | N/A             |
|                    |           |        |                       |                                                              |                 |                 |
|                    |           |        |                       |                                                              |                 |                 |
|                    |           |        |                       |                                                              |                 |                 |
|                    |           |        |                       |                                                              |                 |                 |
| Sugar<br>transport | Lea<br>f  | E-L 31 | N/A                   | N/A                                                          | N/A             | N/A             |
|                    | Lea<br>f  | E-L 35 | VIT_18s00<br>01g05570 | Hexose<br>transporter 2<br>(VvHT2)                           | 2.6194118<br>57 | 0.0002<br>97238 |
|                    |           |        | VIT_01s00<br>26g01890 | UDP-galactose<br>transporter 3-like<br>(VvUTR3-like)         | 1.9822646<br>26 | 0.0059<br>63856 |
|                    |           |        | VIT_05s00<br>20g03140 | Hexose<br>transporter 5<br>(VvHT5)                           | 1.7083556<br>16 | 0.0016<br>92151 |
|                    | Ber<br>ry | E-L 31 | VIT_03s00<br>63g02250 | Polyol<br>transporter 5<br>(VvPLT5)                          | 0.9613009<br>85 | 0.0213<br>37078 |
|                    |           |        | VIT_10s00<br>03g03930 | Inositol<br>transporter 2<br>(VvINT2)                        | 0.5802449<br>01 | 0.0064<br>15565 |
|                    |           |        | VIT_05s00<br>77g02260 | Bidirectional<br>sugar transporter<br>SWEET17<br>(VvSWEET17) | 0.4641261<br>35 | 0.0208<br>62053 |
|                    |           |        | VIT_10s00<br>03g00300 | Triose<br>phosphate/phosp                                    | 0.3891036<br>26 | 0.0150<br>22359 |
|                    |           |        |                       |                                                              |                 |                 |

|                                                        |           |                       |                                        |                                                             |                 |
|--------------------------------------------------------|-----------|-----------------------|----------------------------------------|-------------------------------------------------------------|-----------------|
| hate translocator<br>(VvTPT)                           |           |                       |                                        |                                                             |                 |
| Ber<br>ry                                              | E-L 35    | N/A                   | N/A                                    | N/A                                                         | N/A             |
| Ber<br>ry                                              | E-L 38    | VIT_18s00<br>76g00250 | Sucrose<br>transporter 27<br>(VvSUT27) | 1.0270534<br>23                                             | 0.0255<br>98535 |
|                                                        |           |                       |                                        |                                                             |                 |
|                                                        |           |                       |                                        |                                                             |                 |
| Phenylpropan<br>oids and<br>flavonoids<br>biosynthesis | Lea<br>f  | E-L 31                | N/A                                    | N/A                                                         | N/A             |
|                                                        |           |                       | VIT_01s00<br>11g02960                  | Leucoanthocyani<br>din reductase 1<br>(VvLAR1)              | 10.481070<br>95 |
|                                                        |           |                       | VIT_16s00<br>39g02230                  | Anthocyanidin 3-<br>O-<br>glucosyltransfera<br>se (VvUFGT)  | 9.3709845<br>19 |
|                                                        |           |                       | VIT_02s00<br>25g04720                  | Anthocyanidin<br>synthase<br>(VvANS)                        | 7.8265689<br>24 |
|                                                        | Lea<br>f  | E-L 35                | VIT_04s00<br>23g03370                  | Flavonol<br>synthase/flavano<br>ne 3-hydroxylase<br>(VvFLS) | 6.2557544<br>92 |
|                                                        |           |                       | VIT_18s00<br>01g12800                  | Dihydroflavonol<br>4-reductase<br>(VvDFR)                   | 4.1529283<br>18 |
|                                                        |           |                       | VIT_18s00<br>01g03430                  | Flavonol<br>synthase/flavano<br>ne 3-hydroxylase<br>(VvFLS) | 3.4640272<br>9  |
|                                                        |           |                       | VIT_00s03<br>61g00040                  | Anthocyanidin<br>reductase<br>(VvANR)                       | 2.9498240<br>18 |
|                                                        | Ber<br>ry | E-L 31                | N/A                                    | N/A                                                         | N/A             |
|                                                        | Ber<br>ry | E-L 35                | N/A                                    | N/A                                                         | N/A             |
|                                                        | Ber<br>ry | E-L 38                | VIT_00s06<br>15g00020                  | Mannitol<br>dehydrogenase<br>(VvCAD7)                       | 2.8978293<br>19 |
|                                                        |           |                       |                                        |                                                             | 0.0003<br>85188 |



|                       |                                                          |                 |                 |
|-----------------------|----------------------------------------------------------|-----------------|-----------------|
| VIT_16s00<br>39g01360 | Phenylalanine<br>ammonia lyase<br>(VvPAL)                | 2.6848393<br>42 | 0.0435<br>59059 |
| VIT_16s00<br>39g01170 | Phenylalanine<br>ammonia lyase<br>(VvPAL)                | 2.5203450<br>1  | 5.1784<br>9E-07 |
| VIT_00s06<br>15g00030 | Mannitol<br>dehydrogenase<br>(VvCAD7)                    | 2.3824163<br>67 | 0.0025<br>17939 |
| VIT_16s00<br>39g01300 | Phenylalanine<br>ammonia lyase<br>(VvPAL)                | 2.3538362<br>95 | 0.0010<br>25274 |
| VIT_16s00<br>39g01110 | Phenylalanine<br>ammonia lyase<br>(VvPAL)                | 2.2655609<br>34 | 0.0223<br>09729 |
| VIT_16s01<br>00g01000 | Stilbene synthase<br>4-like (VvSTS4-<br>like)            | 2.0222343<br>37 | 0.0020<br>41952 |
| VIT_16s01<br>00g00850 | Stilbene synthase<br>4-like (VvSTS4-<br>like)            | 1.9896973<br>88 | 0.0308<br>74368 |
| VIT_12s00<br>34g00130 | Anthocyanidin 3-<br>O-<br>glucosyltransferase 2 (VvUFGT) | 1.8427016<br>47 | 0.0014<br>64303 |
| VIT_04s00<br>44g00210 | Mannitol<br>dehydrogenase<br>(VvCAD7)                    | 1.2128976<br>54 | 0.0261<br>16134 |
| VIT_06s00<br>04g08150 | Trans-cinnamate<br>4-<br>monooxygenase<br>(VvC4H)        | 1.0717790<br>28 | 0.0176<br>4136  |
| VIT_07s00<br>31g00350 | Caffeoyl-CoA O-<br>methyltransferase (VvCCOAMT)          | 1.0071612<br>4  | 0.0006<br>26765 |
| VIT_17s00<br>00g04150 | Leucoanthocyanidin reductase 2<br>(VvLAR2)               | 0.9204836<br>88 | 0.0488<br>38407 |
| VIT_08s00<br>40g03040 | Glutathione S-<br>transferase L3<br>(VvGSTL3)            | 0.7482006<br>55 | 0.0060<br>85753 |

|                      |      |        |                       |                                                                                          |                 |                 |
|----------------------|------|--------|-----------------------|------------------------------------------------------------------------------------------|-----------------|-----------------|
| Defense<br>mechanism | Leaf | E-L 31 | VIT_06s00<br>61g00100 | Beta-1,3-<br>glucanase<br>(VvPR-2)                                                       | 4.5958606<br>38 | 0.0333<br>20268 |
|                      |      |        | VIT_05s00<br>77g01550 | Pathogenesis-<br>related protein<br>10.3 (VvPR-<br>10.3)                                 | 1.3388433<br>05 | 0.0355<br>79663 |
|                      | Leaf | E-L 35 | VIT_02s00<br>25g04300 | Thaumatococcus-like<br>protein (VvPR-5)                                                  | 7.1316377<br>72 | 0.0449<br>4005  |
|                      |      |        | VIT_02s00<br>25g04290 | Thaumatococcus-like<br>protein (VvPR-5)                                                  | 6.3967096<br>59 | 4.1640<br>5E-05 |
|                      |      |        | VIT_06s00<br>61g00120 | Beta-1,3-<br>glucanase<br>(VvPR-2)                                                       | 3.9389118<br>73 | 0.0013<br>83384 |
|                      |      |        | VIT_00s01<br>84g00120 | Toll/interleukin-<br>1<br>receptor/resistanc<br>e (TIR) domain-<br>containing<br>protein | 3.8859115<br>64 | 0.0184<br>65883 |
|                      |      |        | VIT_02s00<br>25g04230 | Thaumatococcus-like<br>protein (VvPR-5)                                                  | 3.2836616<br>65 | 0.0203<br>21187 |
|                      |      |        | VIT_14s00<br>81g00030 | Pathogenesis-<br>related protein<br>4A (VvPR-4A)                                         | 3.1817123<br>48 | 0.0210<br>84037 |
|                      |      |        | VIT_02s00<br>25g04250 | Thaumatococcus-like<br>protein (VvPR-5)                                                  | 3.1488409<br>94 | 0.0091<br>86248 |
|                      |      |        | VIT_18s00<br>01g03710 | Toll/interleukin-<br>1<br>receptor/resistanc<br>e (TIR) domain-<br>containing<br>protein | 2.8951838<br>45 | 0.0033<br>91152 |
|                      |      |        | VIT_05s00<br>29g00880 | NB-ARC<br>domain-<br>containing<br>protein                                               | 2.5114879<br>26 | 0.0355<br>42064 |
|                      |      |        | VIT_05s00<br>77g01570 | Pathogenesis-<br>related protein<br>10.3 (VvPR-<br>10.3)                                 | 2.1433730<br>36 | 0.0241<br>44198 |
|                      |      |        | VIT_05s00<br>77g01550 | Pathogenesis-<br>related protein<br>10.3 (VvPR-<br>10.3)                                 | 1.633264        | 0.0154<br>67    |

|           |        |           |                                                                 |           |        |
|-----------|--------|-----------|-----------------------------------------------------------------|-----------|--------|
|           |        | VIT_17s00 | protein EDS1-                                                   | 1.6328241 | 0.0367 |
|           |        | 00g07400  | related                                                         | 73        | 83159  |
|           |        | VIT_17s00 | protein EDS1-                                                   | 1.3680620 | 0.0452 |
|           |        | 00g07560  | related                                                         | 09        | 5429   |
| Ber<br>ry | E-L 31 | N/A       | N/A                                                             | N/A       | N/A    |
| Ber<br>ry | E-L 35 | VIT_13s00 | RN_N domain-<br>containing<br>protein                           | 2.7538953 | 0.0393 |
|           |        | 47g00950  |                                                                 | 28        | 94598  |
|           |        | VIT_05s00 | Pathogenesis-<br>related protein<br>10.3 (VvPR-<br>10.3)        | 2.4900385 | 0.0409 |
|           |        | 77g01590  |                                                                 | 46        | 53162  |
|           |        | VIT_00s04 | RN_N domain-<br>containing<br>protein                           | 2.4778947 | 0.0167 |
|           |        | 67g00010  |                                                                 | 5         | 59386  |
|           |        | VIT_13s01 | RN_N domain-<br>containing<br>protein                           | 2.4141975 | 0.0253 |
|           |        | 01g00300  |                                                                 | 28        | 70541  |
|           |        | VIT_13s01 | RN_N domain-<br>containing<br>protein                           | 2.3034668 | 0.0125 |
|           |        | 58g00210  |                                                                 | 38        | 6742   |
|           |        | VIT_13s01 | RN_N domain-<br>containing<br>protein                           | 2.0975768 | 0.0372 |
|           |        | 58g00260  |                                                                 | 95        | 0172   |
|           |        | VIT_07s01 | RN_N domain-<br>containing<br>protein                           | 2.0710842 | 0.0185 |
|           |        | 41g01030  |                                                                 | 94        | 34408  |
|           |        | VIT_12s00 | RN_N domain-<br>containing<br>protein                           | 1.9758983 | 0.0199 |
|           |        | 34g01490  |                                                                 | 03        | 77404  |
|           |        | VIT_17s00 | Thaumatococcus-like<br>protein (VvPR-5)                         | 1.9631178 | 0.0264 |
|           |        | 00g02470  |                                                                 | 01        | 76649  |
|           |        | VIT_04s00 | Endoribonucleas<br>e dicer 2<br>(VvDcr2)                        | 1.8713291 | 0.0004 |
|           |        | 23g00920  |                                                                 | 89        | 18918  |
|           |        | VIT_13s00 | RN_N domain-<br>containing<br>protein                           | 1.8144500 | 0.0271 |
|           |        | 19g01880  |                                                                 | 47        | 00125  |
|           |        | VIT_00s04 | RN_N domain-<br>containing<br>protein                           | 1.7586197 | 0.0402 |
|           |        | 67g00030  |                                                                 | 74        | 36181  |
|           |        | VIT_18s00 | Toll/interleukin-<br>1<br>receptor/resistanc<br>e (TIR) domain- | 1.5649799 | 0.0038 |
|           |        | 01g03900  |                                                                 | 72        | 39959  |

|                       |                                                                                          |                 |                 |
|-----------------------|------------------------------------------------------------------------------------------|-----------------|-----------------|
|                       | containing<br>protein                                                                    |                 |                 |
| VIT_13s00<br>84g00420 | RN_N domain-<br>containing<br>protein                                                    | 1.5483449<br>19 | 0.0235<br>1503  |
| VIT_05s00<br>77g01540 | Pathogenesis-<br>related protein<br>10.3 (VvPR-<br>10.3)                                 | 1.4780089<br>18 | 4.2663<br>9E-07 |
| VIT_12s00<br>34g00910 | Toll/interleukin-<br>1<br>receptor/resistanc<br>e (TIR) domain-<br>containing<br>protein | 1.4578679<br>85 | 0.0027<br>38712 |
| VIT_18s00<br>41g02120 | Toll/interleukin-<br>1<br>receptor/resistanc<br>e (TIR) domain-<br>containing<br>protein | 1.3974128<br>17 | 0.0100<br>65127 |
| VIT_13s00<br>19g04940 | Protein RNA-<br>directed DNA<br>methylation 3<br>(VvRDM3)                                | 1.3469322<br>52 | 0.0038<br>39959 |
| VIT_18s00<br>89g00100 | Toll/interleukin-<br>1<br>receptor/resistanc<br>e (TIR) domain-<br>containing<br>protein | 1.3022250<br>64 | 0.0122<br>75989 |
| VIT_12s00<br>34g01030 | RN_N domain-<br>containing<br>protein                                                    | 1.2835628<br>21 | 0.0075<br>84517 |
| VIT_18s00<br>01g12390 | Beta-1,3-<br>glucanase<br>(VvPR-2)                                                       | 1.2363637<br>55 | 0.0016<br>66823 |
| VIT_11s01<br>49g00120 | Dicer-like<br>protein 4<br>(VvDCL4)                                                      | 1.1611201<br>3  | 0.0381<br>83156 |
| VIT_08s00<br>40g00070 | Protein argonaute<br>4A (VvAGO4A)                                                        | 1.1335097<br>45 | 0.0395<br>92633 |
| VIT_06s00<br>61g01040 | Protein argonaute<br>5 (VvAGO5)                                                          | 1.1323988<br>29 | 0.0148<br>19184 |

|                                               |      |        |                   |                                               |             |             |
|-----------------------------------------------|------|--------|-------------------|-----------------------------------------------|-------------|-------------|
| Heat shock protein (HSP) and HSP co-chaperons | Leaf | E-L 31 | VIT_12s0059g01320 | Beta-1,3-glucanase (VvPR-2)                   | 1.125450533 | 0.035729415 |
|                                               |      |        | VIT_04s0008g05430 | RNA dependent RNA polymerase 6 (VvRdRp6)      | 1.105707065 | 0.008590499 |
|                                               |      |        | VIT_01s0011g05880 | RNA dependent RNA polymerase 1 (VvRdRp1)      | 0.961610426 | 0.020025787 |
|                                               |      |        | VIT_18s0041g01750 | NB-ARC domain-containing protein              | 0.837814871 | 0.039394598 |
|                                               |      |        | VIT_05s0077g01530 | Pathogenesis-related protein 10.3 (VvPR-10.3) | 1.864331635 | 0.000211093 |
|                                               |      |        | VIT_13s0019g01180 | Beta-1,3-glucanase (VvPR-2)                   | 1.039286395 | 6.09535E-05 |
|                                               |      |        | VIT_04s0008g01570 | 17.3 kDa HSP class II                         | 9.226044184 | 9.22E-05    |
|                                               |      |        | VIT_04s0008g01550 | 17.3 kDa HSP class II                         | 7.603957955 | 0.012837145 |
|                                               |      |        | VIT_04s0008g01510 | 17.3 kDa HSP class II                         | 6.424988963 | 0.002138398 |
|                                               |      |        | VIT_02s0025g00280 | HSP90                                         | 3.025376811 | 0.002847964 |
|                                               |      |        | VIT_13s0019g02850 | 18.2kDa HSP class I                           | 2.377512808 | 0.023444084 |
|                                               |      |        | VIT_13s0019g02740 | 18.2kDa HSP class I                           | 2.125954671 | 0.008010291 |
|                                               |      |        | VIT_10s0003g00260 | DNAJ/Hsp40 protein                            | 1.314887474 | 0.040859804 |
|                                               |      |        | VIT_00s1569g00010 | HSP90                                         | 1.208769929 | 0.026300316 |
|                                               |      |        | VIT_13s0019g01430 | HSP70                                         | 1.185124836 | 0.010733371 |
|                                               |      |        | VIT_09s0070g00380 | HSP90 activator                               | 1.045716007 | 0.033708586 |
|                                               |      |        | VIT_13s0019g03170 | 18.2kDa HSP class I                           | 0.957458782 | 0.000238353 |
|                                               |      |        |                   |                                               |             |             |
|                                               |      |        |                   |                                               |             |             |
|                                               |      |        |                   |                                               |             |             |

|       |        |                       |                                                               |                 |                 |
|-------|--------|-----------------------|---------------------------------------------------------------|-----------------|-----------------|
| Leaf  | E-L 35 | VIT_06s00<br>80g01230 | DNAJ/Hsp40<br>protein                                         | 0.8412589<br>72 | 0.0116<br>73479 |
|       |        | VIT_18s00<br>01g14500 | HSP90                                                         | 3.1563345<br>41 | 2.7276<br>1E-05 |
|       |        |                       | BAG family<br>molecular<br>chaperone<br>regulator 3<br>(BAG3) |                 |                 |
|       |        | VIT_10s00<br>03g04270 |                                                               | 2.9655739<br>19 | 0.0241<br>44198 |
|       |        | VIT_09s00<br>96g00090 | HSP70                                                         | 2.8880060<br>12 | 8.4524<br>9E-07 |
|       |        | VIT_11s01<br>18g00490 | HSP-interacting<br>protein (HIP)                              | 2.4650389<br>67 | 0.0436<br>7104  |
|       |        | VIT_07s00<br>05g01220 | DNAJ/Hsp40<br>protein                                         | 2.2855709<br>7  | 0.0113<br>53252 |
|       |        | VIT_00s15<br>69g00010 | HSP90                                                         | 1.2874258<br>34 | 0.0411<br>07782 |
|       |        |                       |                                                               |                 |                 |
|       |        |                       |                                                               |                 |                 |
| Berry | E-L 31 | N/A                   | N/A                                                           | N/A             | N/A             |
| Berry | E-L 35 | VIT_02s00<br>25g00280 | HSP83                                                         | 1.1584791<br>87 | 0.0077<br>10556 |
|       |        | VIT_00s04<br>15g00030 | HSP70,<br>mitochondrial                                       | 0.8257416<br>03 | 0.0199<br>77404 |
|       |        | VIT_01s00<br>10g00680 | HSP90-5,<br>chloroplastic                                     | 0.7507808<br>25 | 0.0463<br>97019 |
| Berry | E-L 38 | VIT_16s00<br>98g01060 | HSP21                                                         | 1.8302948<br>01 | 0.0003<br>08544 |
|       |        | VIT_06s00<br>04g05770 | 17.3kDa class III                                             | 1.5748981<br>65 | 0.0073<br>65313 |
|       |        | VIT_13s00<br>19g03000 | 18.1kDa class I                                               | 1.5517807<br>55 | 0.0009<br>17532 |
|       |        | VIT_18s00<br>89g01270 | 22.0 kDa class<br>IV                                          | 1.3600462<br>04 | 1.8690<br>9E-06 |
|       |        | VIT_18s00<br>01g01610 | 17.3kDa class I                                               | 1.2995696<br>6  | 0.0068<br>48919 |
|       |        | VIT_18s00<br>01g01570 | 17.3kDa class I                                               | 1.1217704<br>31 | 0.0004<br>5774  |
|       |        | VIT_11s00<br>37g00510 | HSP70                                                         | 1.0964140<br>66 | 0.0136<br>0204  |
|       |        | VIT_04s00<br>08g01610 | 17.3kDa class II                                              | 1.0031441<br>23 | 0.0294<br>37963 |
|       |        |                       |                                                               |                 |                 |
|       |        |                       |                                                               |                 |                 |

|                       |        |        |                       |                                                    |                 |                 |
|-----------------------|--------|--------|-----------------------|----------------------------------------------------|-----------------|-----------------|
| Transcription factors | Leaf   | E-L 31 | VIT_16s00<br>13g01090 | ERF005                                             | 5.0639221<br>51 | 0.0302<br>28975 |
|                       |        |        | VIT_09s00<br>18g00240 | WRKY 40                                            | 2.0924757<br>14 | 0.0149<br>90795 |
|                       |        |        | VIT_01s00<br>26g01550 | Homeobox-leucin zipper protein ATHB1               | 1.6127787<br>83 | 0.0188<br>90721 |
|                       |        |        | VIT_01s00<br>11g00720 | WRKY 57                                            | 1.3657492<br>17 | 7.60E-05        |
|                       |        |        | VIT_05s00<br>77g00730 | WRKY 48                                            | 1.1393154<br>63 | 0.0410<br>01274 |
|                       |        |        | VIT_19s00<br>14g01680 | Transcription factor TCP4                          | 1.1276926<br>28 | 1.35E-08        |
|                       |        |        | VIT_07s00<br>31g00080 | WRKY 7                                             | 0.9963259<br>44 | 0.0296<br>1563  |
|                       |        |        | VIT_18s00<br>01g03240 | ERF004                                             | 8.2445717<br>53 | 0.0379<br>02476 |
|                       |        |        | VIT_17s00<br>00g01280 | WRKY53                                             | 7.0994956<br>32 | 0.0172<br>85867 |
|                       |        |        | VIT_14s00<br>81g00670 | AT-hook motif nuclear-localized protein 19 (AHL19) | 6.2673039<br>56 | 0.0091<br>59622 |
| Leaf                  | E-L 35 |        | VIT_09s00<br>02g09120 | ERF003                                             | 4.6628480<br>83 | 0.0421<br>86627 |
|                       |        |        | VIT_02s00<br>12g01040 | NAC domain-containing protein 86                   | 4.5254162<br>8  | 5.0777<br>1E-10 |
|                       |        |        | VIT_08s00<br>07g07670 | NAC transcription factor 47                        | 4.1060768<br>88 | 0.0012<br>43178 |
|                       |        |        | VIT_04s00<br>08g06000 | ERF045                                             | 3.7040483<br>87 | 0.0098<br>72403 |
|                       |        |        | VIT_19s00<br>90g00840 | WRKY 31                                            | 2.8208232<br>82 | 0.0202<br>45924 |
|                       |        |        | VIT_17s00<br>00g03370 | Protein SAR DEFICIENT 1 (SARD1)                    | 2.5843241<br>83 | 0.0265<br>30846 |
|                       |        |        | VIT_04s00<br>08g05750 | WRKY 18                                            | 2.4024093<br>44 | 0.0184<br>2931  |
|                       |        |        | VIT_17s00<br>00g03390 | Protein SAR DEFICIENT 1 (SARD1)                    | 2.3140281<br>31 | 0.0219<br>51318 |
|                       |        |        | VIT_07s00<br>31g01710 | WRKY51                                             | 1.8845668<br>09 | 0.0035<br>13756 |

|           |        |           |          |           |        |
|-----------|--------|-----------|----------|-----------|--------|
| Ber<br>ry | E-L 31 | N/A       | N/A      | N/A       | N/A    |
| Ber<br>ry | E-L 35 | N/A       | N/A      | N/A       | N/A    |
| Ber<br>ry | E-L 38 | VIT_14s00 | ERF113   | 2.3070120 | 0.0020 |
|           |        | 68g01040  |          | 83        | 41952  |
|           |        | VIT_01s00 | ERF RAV1 | 1.8278040 | 2.1948 |
|           |        | 11g03070  |          | 33        | 1E-05  |
|           |        | VIT_19s00 | ERF004   | 1.3609655 | 0.0063 |
|           |        | 14g02240  |          | 23        | 48559  |
|           |        | VIT_18s00 | ERF110   | 1.1804801 | 0.0297 |
|           |        | 72g00260  |          | 96        | 58167  |
|           |        | VIT_12s00 | ERF004   | 0.7872631 | 0.0038 |
|           |        | 28g03270  |          | 01        | 57149  |
